1  
2  
3  
4  
5  
6  
7  
8  
9  
10  
11  
12  
13  
14  
15

**Clinical gait analysis using video-based pose estimation: multiple perspectives, clinical populations, and measuring change**

Jan Stenum<sup>1,2</sup>, Melody M. Hsu<sup>1,3</sup>, Alexander Y. Pantelyat<sup>4</sup> and Ryan T. Roemmich<sup>1,2\*</sup>

<sup>1</sup>Center for Movement Studies, Kennedy Krieger Institute, Baltimore, MD 21205

<sup>2</sup>Department of Physical Medicine and Rehabilitation, The Johns Hopkins University School of Medicine, Baltimore, MD 21205

<sup>3</sup>Department of Neuroscience, The Johns Hopkins University School of Medicine, Baltimore, MD 21205

<sup>4</sup>Department of Neurology, The Johns Hopkins University School of Medicine, Baltimore, MD 21205

\*denotes corresponding author

Keywords: Gait Analysis, Pose Estimation, OpenPose, Kinematics, Markerless Motion Capture

## 16 **Abstract**

17 Gait dysfunction is common in many clinical populations and often has a profound and  
18 deleterious impact on independence and quality of life. Gait analysis is a foundational  
19 component of rehabilitation because it is critical to identify and understand the specific deficits  
20 that should be targeted prior to the initiation of treatment. Unfortunately, current state-of-the-art  
21 approaches to gait analysis (e.g., marker-based motion capture systems, instrumented gait  
22 mats) are largely inaccessible due to prohibitive costs of time, money, and effort required to  
23 perform the assessments. Here, we demonstrate the ability to perform quantitative gait analyses  
24 in multiple clinical populations using only simple videos recorded using household devices  
25 (tablets). We report four primary advances: 1) a novel, versatile workflow that leverages an  
26 open-source human pose estimation algorithm (OpenPose) to perform gait analyses using  
27 videos recorded from multiple different perspectives (e.g., frontal, sagittal), 2) validation of this  
28 workflow in three different populations of participants (adults without gait impairment, persons  
29 post-stroke, and persons with Parkinson’s disease) via comparison to ground-truth three-  
30 dimensional motion capture, 3) demonstration of the ability to capture clinically relevant,  
31 condition-specific gait parameters, and 4) tracking of within-participant changes in gait, as is  
32 required to measure progress in rehabilitation and recovery. Importantly, our workflow has been  
33 made freely available and does not require prior gait analysis expertise. The ability to perform  
34 quantitative gait analyses in nearly any setting using only household devices and computer  
35 vision offers significant potential for dramatic improvement in the accessibility of clinical gait  
36 analysis across different patient populations.

## 37 Introduction

38 Walking is the primary means of human locomotion. Many clinical conditions – including  
39 neurologic damage or disease (e.g., stroke, Parkinson’s disease (PD), cerebral palsy),  
40 orthopedic injury, and lower extremity amputation – have a debilitating effect on the ability to  
41 walk<sup>1-3</sup>. Quantitative gait analysis is the foundation for effective gait rehabilitation<sup>4</sup>: it is critical  
42 that we objectively measure and identify specific deficits in a patient’s gait and track changes  
43 over time. Unfortunately, there are significant limitations with the current state-of-the-art.  
44 Marker-based motion capture laboratories are considered the gold standard measurement  
45 technique, but they are prohibitively costly and available largely to select hospitals and research  
46 institutions. Other commercially available technologies (e.g., gait mats, wearable systems) are  
47 data-limited, relatively costly, and require specific hardware. There is a clear need for new  
48 technologies that can lessen these barriers and provide accessible and clinically useful gait  
49 analysis with minimal costs of time, money, and effort.

50 Recent developments in computer vision have enabled the exciting prospect of  
51 quantitative movement analysis using only digital videos recorded with household devices such  
52 as smartphones or tablets<sup>5-7</sup>. These pose estimation technologies leverage computer vision to  
53 identify specific “keypoints” on the human body (e.g., knees, ankles) automatically from simple  
54 digital videos<sup>8,9</sup>. The number of applications of pose estimation for human health and  
55 performance has increased exponentially in recent years due to the potential for dramatic  
56 improvement in the accessibility of quantitative movement assessment<sup>6,7,10</sup>. We have previously  
57 used OpenPose<sup>8</sup> – a freely available pose estimation algorithm – to develop and test a  
58 comprehensive video-based gait analysis workflow, demonstrating the ability to measure a  
59 variety of spatiotemporal gait parameters and lower-limb joint kinematics from only short (<10  
60 seconds) sagittal (side view) videos of individuals without gait impairment<sup>11</sup>. Others have also

61 used a variety of approaches to combine pose estimation outputs and neural networks to  
62 estimate different aspects of mobility<sup>5,12–16</sup>.

63 This foundational work in using pose estimation for video-based gait analysis has  
64 demonstrated significant potential of this emerging technology. There are now prime  
65 opportunities to build upon what has already been developed and progress toward direct clinical  
66 applications. In moving toward clinical application, we considered the needs for: 1) flexible  
67 approaches that can accommodate different perspectives based on the space constraints of the  
68 end user (e.g., a clinician may only have access to a long, narrow hallway or hospital corridor  
69 where a sagittal recording of the patient is not possible), 2) testing and validation directly in  
70 clinical populations with gait dysfunction, 3) measurement of clinically relevant gait parameters  
71 that are of particular relevance to specific populations, and 4) the ability to measure changes in  
72 gait, as would be desired during the rehabilitation and/or recovery processes.

73 Here, we present a novel, versatile approach for performing clinical gait analysis using  
74 only simple digital videos. First, we developed and tested a novel workflow that performs a gait  
75 analysis using frontal plane recordings of a person walking either away from or toward the  
76 camera (Figs. 1 and 2). We show that this new workflow can produce accurate estimates of  
77 spatiotemporal gait parameters in individuals without gait impairment as compared to three-  
78 dimensional (3D) motion capture. Second, we test both our frontal and sagittal workflows  
79 directly in two clinical populations with gait impairments that result from neurologic damage or  
80 disease (persons post-stroke or with Parkinson's disease). We demonstrate the ability to  
81 measure a battery of spatiotemporal gait parameters, specific parameters that are clinically  
82 relevant to each condition (i.e., metrics of gait asymmetry in stroke and trunk inclination in PD),  
83 and lower-limb joint kinematics in these patients using household video recording devices, again  
84 comparing to 3D motion capture to assess accuracy. Lastly, we show that our workflows can  
85 track the gait changes that accompany increases in walking speed, as improvement in walking

86 speed is among the most common goals of gait rehabilitation in many different clinical  
87 populations. In sum, the results of this study demonstrate a versatile approach for clinical gait  
88 analysis that requires only a simple digital video that could be recorded using common  
89 household devices.

## 90 **Results**

### 91 *Development and testing of a novel approach for gait videos recorded in the frontal plane*

92 The first goal of this study was to develop and test a novel method to calculate  
93 spatiotemporal gait parameters from gait videos recorded in the frontal plane. Our approach is  
94 based on tracking the size of the person as they appear in the video image (measured with  
95 keypoints from OpenPose) and using trigonometric relationships to estimate depth and,  
96 ultimately, spatial parameters such as step length and gait speed (Fig. 2; see expanded  
97 description in Methods). We first validated our frontal plane approach during overground walking  
98 in a group of young participants without gait impairment (we have previously demonstrated the  
99 accuracy of obtaining gait parameters using sagittal plane videos in the same dataset of  
100 unimpaired participants<sup>11</sup>). We then compared spatiotemporal gait parameters (step time, step  
101 length and gait speed; averaged values for a single walking bout) simultaneously obtained with  
102 3D motion capture and with frontal plane videos positioned to capture the person walking away  
103 from one camera and toward the other camera (data collection setup shown in Fig. 3A).

### 104 Accuracy in adults without gait impairment (relative to 3D motion capture)

105 Step time showed average differences (negative values denote greater values in video  
106 data; positive values denote greater values in motion capture data) and errors (absolute  
107 difference) up to one and two motion capture frames (motion capture recorded at 100 Hz; 0.01  
108 and 0.02 s), respectively, between motion capture and frontal plane video (Fig. 3B; Table S1).  
109 The 95% limits of agreement between motion capture and frontal plane videos ranged from

110  $-0.03$  to  $0.05$  s, suggesting that 95% of differences with motion capture fell within this interval.  
111 Step length showed average differences and errors up to about  $0.02$  and  $0.03$  m, respectively,  
112 between motion capture and frontal plane videos (Fig. 3C). The 95% limits of agreement  
113 between motion capture and frontal plane videos ranged from  $-0.052$  to  $0.094$  m. Gait speed  
114 showed average differences and error up to  $0.04$  and  $0.06$  m s<sup>-1</sup>, respectively, with 95% limits of  
115 agreement ranging between  $-0.11$  and  $0.17$  m s<sup>-1</sup> (Fig. 3D). Correlations for all spatiotemporal  
116 gait parameters between motion capture and frontal plane videos were strong (all  $r$  values  
117 between  $0.872$  and  $0.981$ , all  $P < 0.001$ ; Fig. 3B–D).

### 118 *Testing of video-based gait analysis in persons with neurologic damage or disease*

119 Next, we evaluated both our sagittal and frontal plane workflows in two patient  
120 populations with neurologic damage or disease (persons post-stroke and persons with PD). We  
121 compared spatiotemporal gait parameters (step time, step length, and gait speed), lower-limb  
122 sagittal plane joint kinematics, and condition-specific, clinically relevant parameters (stroke: step  
123 time asymmetry and step length asymmetry; PD: trunk inclination) simultaneously obtained with  
124 3D motion capture and with sagittal and frontal plane videos (data collection setup shown in  
125 Fig. 4A). Note that frontal videos are limited to spatiotemporal gait parameters and that joint  
126 kinematics and trunk inclination can only be obtained from sagittal videos within our current  
127 workflows.

128 We present gait parameters as averaged values across four overground walking bouts  
129 each at 1) preferred and 2) fast speeds (see Table S2 for values of gait parameters). For  
130 preferred speed trials we instructed participants to walk at their preferred speed; for fast speed  
131 trials we instructed participants to walk at the fastest speed that they felt comfortable. Of the  
132 four trials at each speed, there were two trials of the participants walking away from the frontal  
133 camera (with the left side against the sagittal camera) and two trials walking toward the frontal  
134 camera (with the right side against the sagittal camera). We intend our workflows to have

135 clinical applications and therefore present values as session-level values (i.e., the results that  
136 would be obtained as if the four walking trials were treated as a single clinical gait analysis); we  
137 report more detailed comparisons at the level of single trial averages and step-by-step  
138 comparisons in the supplement (Tables S3 and S4).

### 139 Testing in persons post-stroke

140 We then tested how well our workflows could measure gait parameters in persons post-  
141 stroke. Step time showed average differences and errors of zero and one motion capture  
142 frames (recorded at 100 Hz; 0 and 0.01 s), respectively, between motion capture and sagittal  
143 videos; and average differences and errors of two and five motion capture frames (0.02 and  
144 0.05 s), respectively, between motion capture and frontal videos (Fig. 4B and Table 1). The 95%  
145 limits of agreement spanned a narrower interval (−0.04 to 0.04 s) for sagittal videos than frontal  
146 videos (−0.09 to 0.10 s). Correlations of step time between motion capture and videos were  
147 strong (Fig. 4B; all  $r \geq 0.980$ ).

148 Step length showed average differences and errors of about 1 and 3 cm between motion  
149 capture and sagittal videos and average differences and errors of about −3 and 7 cm between  
150 motion capture and frontal videos (Fig. 4C and Table 1). The 95% limits of agreement spanned  
151 intervals of −0.058 to 0.079 m for sagittal videos and −0.154 to 0.087 m for frontal videos.  
152 Correlations of step length between motion capture and videos were strong (Fig. 4C;  $r \geq 0.922$ ).

153 Gait speed showed average differences and errors of 0.02 and 0.04 m s<sup>−1</sup> between  
154 motion capture and sagittal videos and average differences and errors of −0.07 and 0.10 m s<sup>−1</sup>  
155 between motion capture and frontal videos (Fig. 4D and Table 1). The 95% limits of agreement  
156 spanned intervals of −0.11 to 0.14 m s<sup>−1</sup> for sagittal videos and −0.20 to 0.06 m s<sup>−1</sup> for frontal  
157 videos. Correlations of gait speed between motion capture and videos were strong (Fig. 4D;  
158  $r \geq 0.981$ ).

159 Step time asymmetry showed average differences and errors of 0.01 and 0.03 between  
160 motion capture and sagittal videos and average differences and errors of 0.02 and 0.07  
161 between motion capture and frontal videos (Fig. 4E and Table 1). The 95% limits of agreement  
162 spanned intervals of  $-0.04$  to  $0.07$  for sagittal videos and  $-0.10$  to  $0.14$  for sagittal videos.  
163 Correlations of step time asymmetry between motion capture and videos were strong (Fig. 4E;  
164 all  $r \geq 0.865$ ).

165 Step length asymmetry showed average differences and errors of  $-0.002$  and  $0.050$   
166 between motion capture and sagittal videos and average differences and errors of  $-0.042$  and  
167  $0.106$  between motion capture and frontal videos (Fig. 4F and Table 1). The 95% limits of  
168 agreement spanned intervals of  $-0.142$  to  $0.138$  for sagittal videos and  $-0.291$  to  $0.208$  for  
169 frontal videos. Correlations of step length asymmetry were strong between motion capture and  
170 sagittal videos (Fig. 4F;  $r=0.890$ ) but weak between motion capture and frontal videos (Fig. 4F;  
171  $r=0.230$ ).

172 The average mean absolute errors of lower-limb sagittal plane joint kinematics of the  
173 paretic and non-paretic limbs were  $3.3^\circ$ ,  $4.0^\circ$ , and  $6.3^\circ$  at the hip, knee, and ankle, respectively,  
174 between motion capture and sagittal videos (Fig. 4G,H).

#### 175 Testing in persons with Parkinson's disease

176 We next evaluated the performance of the video-based gait analysis in persons with PD  
177 (Fig. 5A). Step time showed average differences and errors of zero and one motion capture  
178 frames ( $0$  and  $0.01$  s) between motion capture and sagittal videos and average differences and  
179 errors of one and three motion capture frames ( $0.01$  and  $0.03$  s) between motion capture and  
180 frontal videos (Fig. 5B and Table 1). The 95% limits of agreement spanned intervals of  $-0.02$  to  
181  $0.02$  s for sagittal videos and  $-0.03$  to  $0.05$  s for frontal videos. Correlations of step time  
182 between motion capture and videos were strong (Fig. 5B; all  $r \geq 0.961$ ).



183 Step length showed average differences and errors of about  $-1$  and  $2$  cm between  
184 motion capture and sagittal videos and average differences and errors of  $-5$  and  $7$  cm between  
185 motion capture and frontal videos (Fig. 5C and Table 1). The 95% limits of agreement spanned  
186 intervals of  $-0.044$  to  $0.023$  m for sagittal videos and  $-0.150$  to  $0.048$  m for frontal videos.  
187 Correlations of step length between motion capture and videos were strong (Fig. 5C; all  
188  $r \geq 0.959$ ).

189 Gait speed showed average differences and errors of  $-0.02$  and  $0.03$  m s<sup>-1</sup> between  
190 motion capture and sagittal videos and average differences and errors of  $-0.12$  and  $0.15$  m s<sup>-1</sup>  
191 between motion capture and frontal videos (Fig. 5D and Table 1). The 95% limits of agreement  
192 spanned intervals of  $-0.07$  to  $0.03$  m s<sup>-1</sup> for sagittal videos and  $-0.28$  to  $0.04$  m s<sup>-1</sup> for frontal  
193 videos. Correlations of gait speed between motion capture and videos were strong (Fig. 5D; all  
194  $r \geq 0.982$ ).

195 Trunk inclination showed average differences and errors of  $0^\circ$  and  $1.5^\circ$  between motion  
196 capture and sagittal videos (Fig. 5E and Table 1; trunk inclination can only be extracted from  
197 sagittal videos, not frontal videos).

198 The average mean absolute errors of left and right lower-limb sagittal plane joint  
199 kinematics were  $2.7^\circ$ ,  $3.5^\circ$ , and  $4.8^\circ$  at the hip, knee, and ankle, respectively, between motion  
200 capture and sagittal videos (Fig. 5F,G).

### 201 *Measuring changes in gait that occur due to changes in gait speed*

202 Next, to evaluate how accurately video analysis can track within-participant gait  
203 changes, we calculated the changes in spatiotemporal gait parameters that accompanied the  
204 increase in gait speed from preferred to fast speed gait trials in persons post-stroke and with PD  
205 (Fig. 6A). The change in step time as a result of faster walking in persons post-stroke showed  
206 average differences and errors of zero and two motion capture frames ( $0$  and  $0.02$  s) when

207 compared between motion capture and sagittal videos and average differences and errors of  
208 zero and four motion capture frames (0 and 0.04 s) when compared between motion capture  
209 and frontal videos (Fig. 6B and Table 2). The 95% limits of agreement of change in step time of  
210 post-stroke walking spanned intervals of  $-0.03$  to  $0.03$  s for sagittal videos and  $-0.08$  to  $0.07$  s  
211 for frontal videos.

212 In persons with PD, the change in step time showed average differences and error of  
213 zero and two motion capture frames (0 and 0.02 s) between motion capture and sagittal videos  
214 and average differences and errors of zero and three motion capture frames (0 and 0.03 s)  
215 between motion capture and frontal videos (Fig. 6B and Table 2). The 95% limits of agreement  
216 of change in step time of PD walking spanned intervals of  $-0.02$  to  $0.02$  s for sagittal videos and  
217  $-0.05$  to  $0.04$  s for frontal videos. Correlations of change in step time between motion capture  
218 and videos were strong (Fig. 6B; all  $r \geq 0.828$ ).

219 The change in step length as a result of faster walking in persons post-stroke showed  
220 average differences and errors of about 0 and 2 cm between motion capture and sagittal videos  
221 and average differences and errors of about  $-1$  and 5 cm between motion capture and frontal  
222 videos (Fig. 6C and Table 2). The 95% limits of agreement of change in step length of post-  
223 stroke walking spanned intervals of  $-0.031$  to  $0.037$  m for sagittal videos and  $-0.088$  to  $0.075$  m  
224 for frontal videos.

225 Change in step length in persons with PD showed average differences and errors of  
226 about 0 and 2 cm between motion capture and sagittal videos and average differences and  
227 errors of about  $-3$  and 7 cm between motion capture and frontal videos (Fig. 6C and Table 2).  
228 The 95% limits of agreement of change in step length of PD walking spanned intervals of  
229  $-0.022$  to  $0.028$  m for sagittal videos and  $-0.122$  to  $0.070$  m for frontal videos. Correlations of  
230 change in step length between motion capture and videos were strong (Fig. 6C; all  $r \geq 0.763$ ).

231 The change in gait speed from preferred to fast speed gait trials in persons post-stroke  
232 showed average differences and errors of 0.01 and 0.04 m s<sup>-1</sup> between motion capture and  
233 sagittal videos and average differences and errors of -0.02 and 0.06 m s<sup>-1</sup> between motion  
234 capture and frontal videos (Fig. 6D and Table 2). The 95% limits of agreement of change in gait  
235 speed of post-stroke walking spanned intervals of -0.09 to 0.11 m s<sup>-1</sup> for sagittal videos and  
236 -0.14 to 0.11 m s<sup>-1</sup> for frontal videos.

237 Finally, in persons with PD, measured change in gait speed showed average differences  
238 and errors of 0 and 0.03 m s<sup>-1</sup> between motion capture and sagittal videos and average  
239 differences and errors of -0.07 and 0.11 m s<sup>-1</sup> between motion capture and frontal videos  
240 (Fig. 6D and Table 2). The 95% limits of agreement of change in gait speed of PD walking  
241 spanned intervals of -0.04 to 0.04 m s<sup>-1</sup> for sagittal videos and -0.19 to 0.06 m s<sup>-1</sup> for frontal  
242 videos. Correlations of change in gait speed between motion capture and videos were strong  
243 (Fig. 6D; all  $r \geq 0.949$ ).

#### 244 *Factors that affect accuracy of the frontal video-based gait analysis workflow*

245 We noted that step length errors were occasionally large when calculated from frontal  
246 videos (up to nearly 30% of the average step length). We have previously described factors  
247 such as the position of the person relative to the camera that influence step length errors when  
248 calculated from sagittal videos<sup>11</sup>. Similarly, we wanted to identify and understand factors that  
249 influence step length errors from videos recorded in the frontal plane.

250 First, we considered that greater depth of the person relative to the frontal plane camera  
251 may lead to less precise step length estimates (Fig. S1). We partitioned the analysis of step  
252 length errors into videos from the frontal plane where the person walks away from the camera or  
253 toward the camera because OpenPose may track keypoints differently when viewing the front of  
254 the person (when walking toward) or the back of the person (when walking away). We found

255 that step length errors increased with greater depth from the camera, so that the person's size  
256 appeared smaller in the image. Step length errors were more affected by depth when the  
257 person walked away from the camera compared to walking toward the camera: from average  
258 step length errors of about 7 cm nearest the camera (beginning of trial when the person walks  
259 away from the camera; end of the trial when the person walks toward the camera), average  
260 errors increased up to about 16 cm when the person walked away, with a more modest increase  
261 of up to 11 cm when the person walked toward the camera. This suggests that precision may  
262 decrease as the person appears smaller, likely due to less precise keypoint tracking by  
263 OpenPose.

264 We also considered whether a scaling effect influenced step length errors so that longer  
265 steps had greater errors. We found that step length errors were not influenced by the magnitude  
266 of step length (Fig. S2).

267 We noted time-lags in the gait cycle detection of the frontal videos relative to motion  
268 capture that could have influenced step length errors (this analysis could only be performed for  
269 the unimpaired participant dataset, in which motion capture and video recordings were  
270 synchronized). The timing of gait cycle detection differed depending on walking direction: when  
271 the person walked away from the camera, gait cycle timings were, on average, four motion  
272 capture frames ( $\sim 0.04$  s) *before* the timing detected from motion capture, and 15 motion capture  
273 frames ( $\sim 0.15$  s) *after* motion capture when the person walked toward the camera (Fig. S3A).  
274 Using gait event timings from motion capture to calculate step lengths from frontal videos, there  
275 was a statistical difference in step length errors when the person walked away from the camera  
276 ( $P=0.024$ ), but not when the person walked toward the camera ( $P=0.501$ ; Fig. S3B). The  
277 average step length error decreased from about 2 to 1 cm in the unimpaired participant dataset  
278 when using gait event timing from the motion capture data in the videos where the person  
279 walked away from the camera.

280 Last, we considered that walking direction relative to the frontal plane camera may have  
281 influenced the accuracy of gait parameters. In the unimpaired participant dataset, in which two  
282 frontal plane cameras simultaneously captured the same walking trial from different vantage  
283 points (see Fig. 3A), we noted a minor overestimation of gait speed by an average of  $0.04 \text{ m s}^{-1}$   
284 from the camera that the person walked away from compared to the camera that the person  
285 walked toward (Table S1). We observed similar, albeit exaggerated, trends in the stroke and PD  
286 datasets. When comparing the average gait speed differences between motion capture and the  
287 frontal plane camera, gait speed was overestimated by  $0.13$  and  $0.21 \text{ m s}^{-1}$  for stroke and PD,  
288 respectively, when the person walked toward the frontal plane camera; the overestimation was  
289 only minor at  $0.01$  and  $0.03 \text{ m s}^{-1}$  for stroke and PD, respectively, when the person walked  
290 toward the camera (Table S3). The overestimation of gait speed was accompanied by greater  
291 errors when comparing the frontal camera to motion capture: average errors were  $0.14$  and  
292  $0.23 \text{ m s}^{-1}$  for stroke and PD, respectively, when the person walked away from the camera;  
293 errors were only  $0.06$  and  $0.08 \text{ m s}^{-1}$  when the person walked toward the camera (Table S3).

294 The trends of overestimation and greater errors from frontal plane recordings where the  
295 person walked away from the camera were mirrored in the results of step length: there were  
296 greater overestimations and errors of step length when the person walked away from the  
297 camera (average overestimations of  $0.056$  and  $0.082 \text{ m}$  and errors of  $0.084$  and  $0.092 \text{ m}$  for  
298 stroke and PD, respectively) compared to when the person walked toward the camera  
299 (Table S3; average overestimations of  $0.013$  and  $0.021 \text{ m}$  and errors of  $0.062$  and  $0.055 \text{ m}$  for  
300 stroke and PD, respectively). This suggests that spatial gait parameters obtained from a frontal  
301 plane camera are influenced by walking direction and that the greatest precision was obtained  
302 when the person walked toward the camera. Furthermore, this also suggests that the accuracy  
303 of gait parameters presented here, when calculated as session-level averages, can be improved  
304 if using only gait trials with the same walking direction.

## 305 Discussion

306 In this study, we demonstrated a new approach for performing clinical gait analyses  
307 using simple videos recorded using common household devices and a workflow that leverages  
308 a freely available pose estimation algorithm (OpenPose) for video-based movement tracking.  
309 We showed that this novel approach can perform accurate gait analyses 1) from videos  
310 recorded from multiple perspectives (e.g., frontal or sagittal viewpoints), 2) across a diverse  
311 range of persons with and without gait impairment, 3) that capture clinically relevant and  
312 condition-specific aspects of gait, and 4) that measure within-participant changes in gait, as are  
313 commonly observed during the course of recovery and/or rehabilitation. These findings  
314 demonstrate the versatility and accessibility of video-based gait analysis and have significant  
315 potential for clinical applications.

316 Interest in video-based, markerless gait analysis has accelerated rapidly. Previous  
317 studies have used various approaches to move quantitative clinical gait analysis outside of the  
318 laboratory or research center and directly into the home or clinic<sup>5,6,13–15,17</sup>. Here, we aimed to  
319 develop a single approach that addressed several outstanding needs, including the needs to  
320 accommodate multiple different types of environments/viewing perspectives, use of datasets in  
321 multiple clinical populations with gait impairment, measurement of both spatiotemporal gait  
322 parameters and lower extremity two-dimensional kinematics, and measurement of within-  
323 participant changes in gait. It is also notable that we achieved accurate results using multiple  
324 different video recording devices with different sampling rates. By comparing our results against  
325 gold standard motion capture measurements, we provide data about the accuracy of all findings  
326 with respect to the current state-of-the-art.

327 Our findings also enable us to progress toward development of a series of best practices  
328 for video-based clinical gait analysis. Unsurprisingly, we found that video-based gait analyses  
329 generated from videos recorded using a sagittal viewpoint generally led to stronger correlations

330 with motion capture data and lower error when compared to videos recorded from frontal  
331 viewpoints. This was particularly evident in gait parameters that require especially high levels of  
332 precision (e.g., step length asymmetry in persons post-stroke). Similar to our previous work<sup>11</sup>,  
333 we also found that video-based measurements of ankle kinematics were generally less accurate  
334 (relative to motion capture) than measurements of hip or knee kinematics in persons with or  
335 without gait impairment. Therefore, when using the current iteration of our workflow, a user is  
336 likely to obtain best results by recording a sagittal video (if possible) and targeting measurement  
337 of spatiotemporal gait parameters and more proximal lower limb kinematics. We emphasize that  
338 our single-camera, video-based approach is not intended to reach marker-based motion capture  
339 levels of accuracy that other multi-camera approaches may target<sup>6,18,19</sup> or that may be required  
340 by various scientific disciplines (e.g., biomechanics, human motor control), but rather offers  
341 clinicians and other end-users access to a reasonably accurate approach for clinical gait  
342 analysis that requires minimal time and only a single video recording device.

343 It is informative to consider the accuracy of our workflow relative to reported test-retest  
344 minimal detectable change or minimal clinical important difference values of the population of  
345 interest. For example, a meaningful change in gait speed is often reported as  $0.10 \text{ m s}^{-1}$ <sup>20</sup>, but  
346 may vary from  $0.05$  up to  $0.30 \text{ m s}^{-1}$  depending on the population studied<sup>21–32</sup>. The average  
347 errors of our video-based measurements relative to motion capture generally fall within these  
348 margins, suggesting that gait speed is likely to be reliably measured in many populations (e.g.,  
349 older adults, post-stroke, PD, following hip fracture, cerebral palsy, multiple sclerosis) using our  
350 workflow. Minimal detectable changes in gait kinematics may also be dependent on the  
351 population of interest, with estimates ranging from about  $4^\circ$  to  $11^\circ$  of lower-limb sagittal plane  
352 kinematics<sup>26,28,33–36</sup>. Average errors of sagittal plane hip and knee kinematics in our study were  
353 less than  $4^\circ$ , while errors at the ankle were up to  $6.8^\circ$ , suggesting that hip and knee kinematics

354 from our workflow can be accurately tracked while continued improvement in measurement of  
355 ankle angles is needed.

356         There remain additional significant hurdles to widespread implementation of video-based  
357 clinical gait analyses. There is a crucial unmet need for improved ease of use, as the user  
358 currently must have access to specific computing hardware (i.e., pose estimation is most  
359 efficient when using a graphics processing unit (GPU)), download all relevant software, record  
360 the videos, and manually process each video through the workflow. This generates an output  
361 that is contained within the software. This process is not well-suited for users without some level  
362 of technical expertise; there is an important need for new technologies that can streamline these  
363 steps and remove much of the technical know-how and burden of manual processing.  
364 Furthermore, there is a need for validation in additional adult and pediatric clinical populations,  
365 as previous work has shown that existing pose estimation algorithms have difficulty with tracking  
366 patient populations with anatomical structures that likely differ significantly from the images used  
367 to train the algorithms<sup>13</sup>. Thirteen of the participants with stroke used a cane; we did not observe  
368 instances where OpenPose mistakenly identified the cane as a limb. Lastly, it is likely that  
369 accuracy will continue to improve in the future as both computer vision algorithms and methods  
370 for data post-processing continue to advance. In this study, we used a pre-trained network<sup>8</sup>,  
371 while a different network that was trained to be specific to both gait and clinical condition may  
372 further improve accuracy (the challenges of existing pre-trained networks for human pose  
373 estimation in movement science have been well-documented<sup>37</sup>).

## 374 **Conclusion**

375         In this study, we developed and tested a novel approach for video-based clinical gait  
376 analysis. We showed that this approach accommodates multiple viewing perspectives, provides  
377 accurate and clinically relevant gait analyses (as compared to 3D motion capture) across  
378 multiple participant populations with and without gait impairment, and tracks within-participant



379 changes in gait that are relevant to rehabilitation and recovery outcomes. All software needed to  
380 perform these analyses is freely available at [https://github.com/janstenum/GaitAnalysis-](https://github.com/janstenum/GaitAnalysis-PoseEstimation/tree/Multiple-Perspectives)  
381 [PoseEstimation/tree/Multiple-Perspectives](https://github.com/janstenum/GaitAnalysis-PoseEstimation/tree/Multiple-Perspectives), where we also provide a series of detailed  
382 instructions to assist the user. There is an urgent need to begin to move these emerging  
383 technologies with potential for significant clinical applications toward more user-friendly  
384 solutions.

## 385 **Methods**

### 386 *Participants*

387 We recruited 44 individuals post-stroke (15 female, 29 male; age  $61 \pm 11$  years  
388 (mean $\pm$ SD); body mass  $90 \pm 23$  kg; height  $1.73 \pm 0.11$  m) and 19 individuals with PD (6 female, 13  
389 male; age  $67 \pm 7$  years; body mass  $77 \pm 14$  kg; height  $1.71 \pm 0.09$  m) to participate in the study; all  
390 participants were capable of walking independently with or without an assistive device. All  
391 participants gave written informed consent before enrolling in the study in accordance with the  
392 protocol approved by The Johns Hopkins School of Medicine Institutional Review Board  
393 (Protocol IRB00255175). Additionally, we used a publicly available dataset<sup>38</sup> of overground  
394 walking sequences from 32 unimpaired participants (10 women, 22 men) made available at  
395 <http://bytom.pja.edu.pl/projekty/hm-gpiatk>. The dataset included synchronized 3D motion  
396 capture files and digital video recordings of the walking sequences. The publicly available  
397 dataset does not contain identifiable participant information and faces have been blurred in the  
398 video recordings. Our analysis of the publicly available videos was deemed exempt by The  
399 Johns Hopkins University School of Medicine Institutional Review Board.

### 400 *Protocol and data collection*

401 Participants visited our laboratory for one day of testing. They first performed ten-meter  
402 walk tests at their preferred speed and the fastest speed at which they felt comfortable walking.  
403 Participants then performed eight overground walking trials (four trials at each preferred and fast  
404 speeds) across a walkway of 4.83 m.

405 We mounted two commercially available tablets (Samsung Galaxy Tab A7) on tripods  
406 positioned to capture frontal ( $C_{\text{Front}}$ ) and sagittal ( $C_{\text{Sag}}$ ) plane views of the overground walking  
407 trials (video recordings occurred at a 30-Hz sampling rate; see Fig. 1 for overview). Of the eight  
408 total walking trials, the participant walked away from the frontal plane camera with the left side

409 turned to the sagittal plane camera during four of the trials; during the other four trials, the  
410 participant walked toward the frontal plane camera with the right side turned to the sagittal plane  
411 camera. Tablet cameras obtained videos with 1920 × 1080 pixel resolution. The frontal-view  
412 tablet was positioned 1.52 m behind the start/end of the walkway and the sagittal-view tablet  
413 was positioned 3.89 m to the side of the midpoint of the walkway. The tablet positions were  
414 chosen to achieve the longest walkway in which the person remained visible to both frontal and  
415 sagittal tablets, given the space restrictions of the laboratory. The frontal- and sagittal-view  
416 tablets were rotated to capture portrait and landscape views, respectively. The height of the  
417 frontal-view camera was set so that the entire participant remained visible when they were  
418 nearest the camera (about 0.85 m). The height of the sagittal-view camera was about 1.18 m so  
419 that the participant appeared in the middle of the image as they travelled across the walkway.

420 We simultaneously recorded walking trials using ten cameras (Vicon Vero, Denver, CO,  
421 USA) as part of a marker-based, 3D motion capture system at 100 Hz. We placed reflective  
422 markers on the seventh cervical vertebrae (C7), tenth thoracic vertebrae, jugular notch, xiphoid  
423 process, and bilaterally over the second and fifth metatarsal heads, calcaneus, medial and  
424 lateral malleoli, shank, medial and lateral femoral epicondyles, thigh, greater trochanter, iliac  
425 crest, and anterior and posterior superior iliac spines (ASIS and PSIS, respectively).

426 In the previously published dataset of unimpaired adults without gait impairment, we  
427 used a subset of the data (sequences labelled *s1*) that consisted of a single walking bout of  
428 approximately 5 m that included gait initiation and termination. We excluded data for one  
429 participant because the data belonged to another subset with diagonal walking sequences. We  
430 used data from two digital cameras (Basler Pilot piA1900-32gc, Ahrensburg, Germany) that  
431 simultaneously recorded frontal plane views of the person walking away from one camera and  
432 toward the other camera (see Fig. 3A for overview). The digital cameras obtained videos with  
433 960 × 540 pixel resolution captured at 25 Hz. The average distance from the starting position of

434 the participants to the cameras were 2.50 and 7.28 m for the camera that recorded the  
435 participant walking away and toward, respectively. Cameras were mounted on tripods and the  
436 height was about 1.3 m. Motion capture cameras (Vicon MX-T40, Denver, CO, USA) recorded  
437 3D marker positions at 100 Hz. Markers were placed on the seventh cervical vertebrae, tenth  
438 thoracic vertebrae (T10), manubrium, sternum, right upper back and bilaterally on the front and  
439 back of the head, shoulder, upper arm, elbow, forearm, wrist (at radius and ulna), middle finger,  
440 ASIS, PSIS, thigh, knee, shank, ankle, heel, and toe.

#### 441 *Data processing and analysis*

442 Motion capture data from the participants with stroke or PD were smoothed using a zero-  
443 lag 4<sup>th</sup> order low-pass Butterworth filter with a cutoff frequency of 7 Hz. The motion capture data  
444 from the participants without gait impairment in the publicly available dataset had already been  
445 smoothed. We identified left and right heel-strikes and toe-offs as the positive and negative  
446 peaks, respectively, of the anterior-posterior left or right ankle markers relative to the torso<sup>39</sup>.

447 All digital video data were processed in two steps: 1) using OpenPose to automatically  
448 detect and label two-dimensional coordinates of various anatomical keypoints, 2) post-  
449 processing in MATLAB using custom-written code. The OpenPose analysis was similar for all  
450 video data, whereas we divided the post-processing workflows into two separate pipelines for  
451 videos capturing frontal or sagittal plane views.

#### 452 1. OpenPose Analysis

453 a. We ran the OpenPose demo<sup>8</sup> over sequences of the video recordings that  
454 contained each walking bout. We have previously used a cloud-based service to  
455 run OpenPose with remote access to GPUs. Here we used a local computer with  
456 a GPU (NVIDIA GeForce RTX 3080) so that videos containing identifiable  
457 participant information were not shared with any third-party services.

- 458           b. Videos were analyzed in OpenPose using the BODY\_25 keypoint model that  
459           tracks the following 25 keypoints: nose, neck, mid-hip and bilateral keypoints at  
460           the eyes, ears, shoulders, elbows, wrists, hips, knees, ankles, heels, halluces,  
461           and fifth toes.
- 462           c. The output of the OpenPose analysis yielded: 1) JSON files for every video  
463           frame containing pixel coordinates of each keypoint detected in the frame, and 2)  
464           a new video file in which a stick figure that represents the detected keypoints is  
465           overlaid on the original video recording.

## 466       2. MATLAB Post-processing

467       We created custom-written MATLAB code to process the JSON files that were output  
468       from the OpenPose analysis ([https://github.com/janstenum/GaitAnalysis-  
469       PoseEstimation/tree/Multiple-Perspectives](https://github.com/janstenum/GaitAnalysis-PoseEstimation/tree/Multiple-Perspectives)). As an initial step, we checked whether  
470       multiple persons had been detected by OpenPose in the video (this can be the case  
471       when multiple people are visible or when OpenPose incorrectly detects keypoints in  
472       inanimate objects). Note that OpenPose has an optional flag to track only a single  
473       person; however, we did not use this option to avoid scenarios where the participant had  
474       not been tracked in favor of other persons (e.g., the experimenter). If multiple persons  
475       were detected, three MATLAB scripts were called that 1) required user input to identify  
476       the participant in a single frame of the video, 2) automatically identified the participant  
477       throughout the video and 3) allowed the user to visually inspect that the participant had  
478       been identified and correct any errors. Following the person-identification step, MATLAB  
479       workflows were different depending on whether the camera captured a frontal or sagittal  
480       plane view of the walking trial. We describe each workflow below.

- 481           a. Frontal plane videos

- 482 i. We changed the pixel coordinate system so that the positive vertical was  
483 directed upward and that positive horizontal was directed toward the  
484 participant's left side.
- 485 ii. We visually inspected and corrected errors in left-right identification of the  
486 limbs. In all, 362 (less than 1% of the 131,519 frames in total) frontal  
487 video frames were corrected.
- 488 iii. We gap-filled keypoint trajectories using linear interpolation for gaps  
489 spanning to up 0.12 s.
- 490 iv. We identified events of left and right gait cycles by local maxima and  
491 minima of the vertical distance between the left and right ankle keypoints.  
492 Gait events on the left limb were detected at positive peaks and gait  
493 events on the right limb were detected at negative peaks in trials where  
494 the participants walked away from the frontal plane camera; and vice  
495 versa in trials where the participants walked toward the camera. In order  
496 to unify the nomenclature of gait events across motion capture data and  
497 sagittal and frontal plane video data, we refer to the gait events of the  
498 frontal plane analysis as heel-strikes.
- 499 v. Last, we calculated a time-series of depth-change of the torso relative to  
500 the initial starting depth. We used the following equation to calculate  
501 depth-change ( $\Delta d_i$ ):

$$\Delta d_i = \frac{d_{\text{Ref}}}{s_{\text{Ratio}}} - d_{\text{Ref}}, \quad (\text{Eq. 1})$$

502 where  $d_{\text{Ref}}$  is the initial reference depth of the person relative to the frontal  
503 camera position and  $s_{\text{Ratio}}$  is the ratio of the pixel size of the person  
504 relative to the pixel size of the torso at the initial reference depth.  
505 Equation 1 is derived from trigonometric relations between the actual size

506 of the person and the pixel size of the person as they appear on the  
507 image plane of the camera (see Fig. 2A,B for an overview). We assume a  
508 fixed position of a pinhole camera with no lens distortion. We know the  
509 following relation when the person is at an initial reference depth from the  
510 camera:

$$\frac{s_{\text{Ref}}}{f} = \frac{s}{d_{\text{Ref}}}, \quad (\text{Eq. 2})$$

511 where  $f$  is the focal length,  $s_{\text{Ref}}$  is the pixel size of the person at the  
512 reference distance and  $s$  is the actual size of the person. With a depth-  
513 change  $\Delta d_i$  we obtain the following relationship:

$$\frac{s_i}{f} = \frac{s}{d_{\text{Ref}} + \Delta d_i}, \quad (\text{Eq. 3})$$

514 where  $s_i$  is the pixel size of the person as they appear with a depth-  
515 change. From Equations 2 and 3, we obtain:

$$s_{\text{Ratio}} = \frac{s_i}{s_{\text{Ref}}} = \frac{d_{\text{Ref}}}{d_{\text{Ref}} + \Delta d_i}. \quad (\text{Eq. 4})$$

516 Using Equation 4 we obtain the expression in Equation 1. From  
517 Equation 1 we can estimate depth changes using only information about  
518 the reference depth of the person and the pixel size of the person. We  
519 validated this approach in Fig. 2C by comparing the predicted value of  
520  $s_{\text{Ratio}}$  based on Equation 4 (with a reference depth of 4.88 m) with values  
521 of  $s_{\text{Ratio}}$  found by manually tracking the pixel size of images of a person  
522 standing at depth-changes up to 18.29 m. The predicted relationship  
523 closely tracks the manually annotated pixel sizes in Fig. 2C, suggesting  
524 that Equation 1 can be used to accurately calculate depth-changes in the  
525 frontal plane.

526 Next, we considered methodological factors that may affect accuracy of  
527 the calculated depth-changes. We chose to track the size of the torso

528 because there are only minor rotations in the transverse plane during the  
529 gait cycle, which ensures a consistent perspective during a gait trial<sup>40</sup>.  
530 Torso size can be represented by 1) torso height (vertical distance  
531 between neck and midhip keypoints), 2) shoulder width (horizontal  
532 distance between left and right shoulder keypoints) and 3) the torso area  
533 (calculated as the square root of the product of torso height and shoulder  
534 width to ensure that size scales appropriately with Equation 1). We  
535 evaluated the best tracking and smoothing method from the combination  
536 that yielded the lowest step length error and SD of step length differences  
537 between motion capture and frontal plane videos (See Fig. S4). Based on  
538 the evaluation, we chose to track torso size and low-pass filter size ratio  
539 using a cutoff frequency at 0.4 Hz.

540 b. Sagittal plane videos

- 541 i. We changed the pixel coordinate system so that positive vertical was  
542 direction upward and positive horizontal was the direction of travel.
- 543 ii. We visually inspected and corrected errors in left-right identification of the  
544 limbs. In all, 5,369 (about 3.5% of the 153,669 frames in total) of sagittal  
545 video frames were corrected.
- 546 iii. We gap-filled keypoint trajectories using linear interpolation for gaps  
547 spanning up to 0.12 s.
- 548 iv. We smoothed trajectories using a zero-lag 4<sup>th</sup> order low-pass Butterworth  
549 filter with a cutoff frequency at 5 Hz.
- 550 v. We calculated a scaling factor to dimensionalize pixel distance. The  
551 scaling factor was as a ratio of a known distance in the line of progression  
552 relative to the pixel distance. We used the distance between strips of tape  
553 on the walkway.



554 vi. We identified left and right heel-strikes and toe-offs as the positive and  
555 negative peaks, respectively, of the horizontal trajectories of the left or  
556 right ankle keypoints relative to the mid-hip keypoint.

557 We cross-referenced gait events that had independently been identified in motion  
558 capture data and sagittal or frontal plane video data to ensure that all gait parameters were  
559 obtained based on the same gait cycles.

560 We calculated the following spatiotemporal gait parameters:

- 561 • Step time: duration between consecutive bilateral heel-strikes.
- 562 • Step length (we used two methods to calculate step lengths): 1) as the horizontal  
563 distance between ankle markers or keypoints at instants of heel-strike and 2) as the  
564 distance travelled by the torso between consecutive bilateral heel-strikes. We used the  
565 distance travelled by the torso because the distances between the ankles at a heel-strike  
566 instant cannot be obtained from frontal plane videos. When comparing step lengths  
567 between motion capture and sagittal plane videos, we used the distance between the  
568 ankles; all step length comparisons with frontal plane data used the distance travelled by  
569 the torso. Step length methods were highly correlated ( $r=0.938$ ) with an average  
570 difference of  $-0.069$  m, suggesting that the distance travelled by the torso was about  
571 7 cm longer than the distance between the ankles (Fig. S5).
- 572 • Gait speed: step length divided by step time.

573 In stroke and PD data, we calculated paretic/non-paretic or left/right step times and step  
574 lengths, respectively. Paretic/left step time is the duration from non-paretic/right heel-strike until  
575 paretic/left heel-strike; vice versa for non-paretic/right step times. Paretic/left step length,  
576 calculated as the distance between the ankles, is the distance at paretic/left heel-strike; vice  
577 versa for non-paretic/right step lengths. Paretic/left step length, calculated as the distance

578 travelled by the torso, is the distance travelled from non-paretic/right heel-strike to paretic/left  
579 heel-strike; vice versa for non-paretic/right step lengths.

580 We calculated the changes in spatiotemporal gait parameters that accompany speed-  
581 changes (i.e., shorter step times, longer step lengths, and faster gait speeds) from the preferred  
582 and fast speed trials in the stroke and PD data. This allowed us to test how well gait changes  
583 can be tracked using video recordings.

584 There are several commonly observed, clinically relevant gait impairments in stroke  
585 (e.g., gait asymmetry<sup>41</sup>) and PD (e.g., stooped posture<sup>42</sup>) – thus, for each population we  
586 calculated condition-specific gait parameters. We calculated step time asymmetry and step  
587 length asymmetry (difference between steps divided by sum of steps) in stroke gait and trunk  
588 inclination in PD gait. Trunk inclination was calculated as the angle relative to vertical between  
589 the mid-hip and neck keypoints at heel-strikes in the sagittal plane videos and the angle  
590 between the C7 and right PSIS markers at heel-strikes in the motion capture data. During initial  
591 comparisons we found an offset between motion capture and sagittal plane video data; we  
592 subtracted a fixed offset of 12° from trunk inclination in the sagittal plane video data in order to  
593 create a better numeric comparison with the motion capture data.

594 We calculated sagittal plane lower limb joint kinematics at the hip, knee, and ankle using  
595 two-dimensional coordinates from the motion capture data and the sagittal plane video data. We  
596 used markers at the greater trochanter and lateral femoral epicondyles and keypoints at the hip  
597 and knee to calculate hip angles; markers at the greater trochanter, lateral femoral epicondyles  
598 and lateral malleoli and keypoints at the hip, knee, and ankle to calculate knee angles; markers  
599 at the lateral femoral epicondyles, lateral malleoli, and 5<sup>th</sup> metatarsal and keypoints at the knee,  
600 ankle, and hallux to calculate ankle angles.

601 From our stroke and PD datasets, we compared gait parameters at three levels of  
602 comparisons: at the step level calculating parameters for individual steps, as averages across  
603 single gait trials, and at the session level calculated as averages across several gait trials. In  
604 total there were 2,684 individual gait cycles (1,790 for stroke, 709 for PD and 185 for  
605 unimpaired), 527 gait trials (352 for stroke, 144 for PD and 31 for unimpaired) and 124 session  
606 level averages (88 for stroke and 36 for PD). We present session level gait parameters for  
607 stroke and PD and trial level for unimpaired data in the main text of the manuscript; we show  
608 results at the trial and step level in the Tables S3 and S4.

609 In the stroke and PD datasets, we compared gait parameters obtained during trials that  
610 were simultaneously recorded by motion capture, sagittal plane videos, and frontal plane videos  
611 (see Fig. 1 for overview). Note that some parameters (joint kinematics and trunk inclination) can  
612 only be obtained with motion capture data and sagittal plane videos.

613 In the dataset with unimpaired participants, we compared spatiotemporal gait  
614 parameters obtained during trials that were simultaneously captured with motion capture data  
615 and with two frontal cameras positioned to capture the participant walking away from one  
616 camera and toward the other camera (see Fig. 3A for overview).

### 617 *Statistical analyses*

618 We compared gait parameters obtained with motion capture and video by calculating  
619 differences, errors (absolute differences) and 95% limits of agreement (mean  
620 differences  $\pm 1.96 \times SD$ ). We assessed correlations by calculating Pearson correlation  
621 coefficients.

### 622 **Data availability**

623           The dataset of unimpaired gait is available from [http://bytom.pja.edu.pl/projekty/hm-](http://bytom.pja.edu.pl/projekty/hm-gpjatk)  
624 [gpjatk](http://bytom.pja.edu.pl/projekty/hm-gpjatk). The stroke and PD datasets contain videos with identifiable information and are  
625 therefore not available.

#### 626 **Code availability**

627           Code for our workflow is available at [https://github.com/janstenum/GaitAnalysis-](https://github.com/janstenum/GaitAnalysis-PoseEstimation/tree/Multiple-Perspectives)  
628 [PoseEstimation/tree/Multiple-Perspectives](https://github.com/janstenum/GaitAnalysis-PoseEstimation/tree/Multiple-Perspectives).

#### 629 **Acknowledgements**

630           We acknowledge funding from the RESTORE Center at Stanford University (NIH grant  
631 P2CHD101913), the American Parkinson Disease Association (grant 964604), and the Sheikh  
632 Khalifa Stroke Institute at Johns Hopkins Medicine.

#### 633 **Author contributions**

634           J.S. designed the study, collected data, wrote all code, processed and analyzed data,  
635 and wrote and revised the manuscript. M.H. assisted with data collection and data processing,  
636 and revised the manuscript. A.P. provided clinical research support and revised the manuscript.  
637 R.T.R. obtained funding support, designed the study, and wrote and revised the manuscript.

#### 638 **Competing interests**

639           The authors declare no Competing Financial or Non-Financial Interests.

640 **References**

- 641 1. Olney, S. J. & Richards, C. Hemiparetic gait following stroke. Part I: Characteristics. *Gait &*  
642 *Posture* **4**, 136–148 (1996).
- 643 2. Morris, M. E., Iansek, R., Matyas, T. A. & Summers, J. J. The pathogenesis of gait  
644 hypokinesia in Parkinson's disease. *Brain : a journal of neurology* **117 ( Pt 5)**, 1169–81  
645 (1994).
- 646 3. Armand, S., Decoulon, G. & Bonnefoy-Mazure, A. Gait analysis in children with cerebral  
647 palsy. *EFORT Open Rev* **1**, 448–460 (2016).
- 648 4. Perry, J. & Burnfield, J. M. *Gait Analysis: Normal and Pathological Function*. (SLACK Inc.,  
649 2010).
- 650 5. Kidziński, Ł. *et al.* Deep neural networks enable quantitative movement analysis using single-  
651 camera videos. *Nature Communications* **11**, 4054 (2020).
- 652 6. Uhlich, S. D. *et al.* OpenCap: 3D human movement dynamics from smartphone videos.  
653 *bioRxiv* 2022.07.07.499061 (2022) doi:10.1101/2022.07.07.499061.
- 654 7. Stenum, J. *et al.* Applications of Pose Estimation in Human Health and Performance across  
655 the Lifespan. *Sensors* **21**, (2021).
- 656 8. Cao, Z., Hidalgo, G., Simon, T., Wei, S. E. & Sheikh, Y. OpenPose: Realtime Multi-Person  
657 2D Pose Estimation Using Part Affinity Fields. *IEEE transactions on pattern analysis and*  
658 *machine intelligence* **43**, 172–186 (2021).
- 659 9. Nath, T. *et al.* Using DeepLabCut for 3D markerless pose estimation across species and  
660 behaviors. *Nature Protocols* **14**, 2152–2176 (2019).
- 661 10. Moro, M. *et al.* A markerless pipeline to analyze spontaneous movements of preterm  
662 infants. *Computer Methods and Programs in Biomedicine* **226**, 107119 (2022).
- 663 11. Stenum, J., Rossi, C. & Roemmich, R. T. Two-dimensional video-based analysis of  
664 human gait using pose estimation. *PLoS computational biology* **17**, e1008935 (2021).

- 665 12. Needham, L. *et al.* The development and evaluation of a fully automated markerless  
666 motion capture workflow. *Journal of Biomechanics* **144**, 111338 (2022).
- 667 13. Cimorelli, A., Patel, A., Karakostas, T. & Cotton, R. J. Portable in-clinic video-based gait  
668 analysis: validation study on prosthetic users. *medRxiv* 2022.11.10.22282089 (2022)  
669 doi:10.1101/2022.11.10.22282089.
- 670 14. Lonini, L. *et al.* Video-Based Pose Estimation for Gait Analysis in Stroke Survivors  
671 during Clinical Assessments: A Proof-of-Concept Study. *Digital Biomarkers* **6**, 9–18 (2022).
- 672 15. Mehdizadeh, S. *et al.* Concurrent validity of human pose tracking in video for measuring  
673 gait parameters in older adults: a preliminary analysis with multiple trackers, viewing angles,  
674 and walking directions. *Journal of NeuroEngineering and Rehabilitation* **18**, 139 (2021).
- 675 16. Washabaugh, E. P., Shanmugam, T. A., Ranganathan, R. & Krishnan, C. Comparing the  
676 accuracy of open-source pose estimation methods for measuring gait kinematics. *Gait &*  
677 *Posture* **97**, 188–195 (2022).
- 678 17. A. Sabo, S. Mehdizadeh, A. Iaboni, & B. Taati. Estimating Parkinsonism Severity in  
679 Natural Gait Videos of Older Adults With Dementia. *IEEE Journal of Biomedical and Health*  
680 *Informatics* **26**, 2288–2298 (2022).
- 681 18. Kanko, R. M. *et al.* Assessment of spatiotemporal gait parameters using a deep learning  
682 algorithm-based markerless motion capture system. *Journal of Biomechanics* **122**, 110414  
683 (2021).
- 684 19. Kanko, R. M., Laende, E. K., Davis, E. M., Selbie, W. S. & Deluzio, K. J. Concurrent  
685 assessment of gait kinematics using marker-based and markerless motion capture. *Journal*  
686 *of Biomechanics* **127**, 110665 (2021).
- 687 20. Studenski, S. *et al.* Gait Speed and Survival in Older Adults. *JAMA* **305**, 50–58 (2011).
- 688 21. Hass, C. J. *et al.* Defining the Clinically Meaningful Difference in Gait Speed in Persons  
689 With Parkinson Disease. *Journal of Neurologic Physical Therapy* **38**, (2014).

- 690 22. Perera, S., Mody, S. H., Woodman, R. C. & Studenski, S. A. Meaningful Change and  
691 Responsiveness in Common Physical Performance Measures in Older Adults. *Journal of the*  
692 *American Geriatrics Society* **54**, 743–749 (2006).
- 693 23. Goldberg, A. & Schepens, S. Measurement error and minimum detectable change in 4-  
694 meter gait speed in older adults. *Aging Clinical and Experimental Research* **23**, 406–412  
695 (2011).
- 696 24. Palombaro, K. M., Craik, R. L., Mangione, K. K. & Tomlinson, J. D. Determining  
697 Meaningful Changes in Gait Speed After Hip Fracture. *Physical Therapy* **86**, 809–816 (2006).
- 698 25. Tilson, J. K. *et al.* Meaningful Gait Speed Improvement During the First 60 Days  
699 Poststroke: Minimal Clinically Important Difference. *Physical Therapy* **90**, 196–208 (2010).
- 700 26. Kesar, T. M., Binder-Macleod, S. A., Hicks, G. E. & Reisman, D. S. Minimal detectable  
701 change for gait variables collected during treadmill walking in individuals post-stroke. *Gait &*  
702 *Posture* **33**, 314–317 (2011).
- 703 27. Lewek, M. D. & Sykes, R. I. Minimal Detectable Change for Gait Speed Depends on  
704 Baseline Speed in Individuals With Chronic Stroke. *Journal of Neurologic Physical Therapy*  
705 **43**, (2019).
- 706 28. Geiger, M. *et al.* Minimal detectable change of kinematic and spatiotemporal parameters  
707 in patients with chronic stroke across three sessions of gait analysis. *Human Movement*  
708 *Science* **64**, 101–107 (2019).
- 709 29. Andreopoulou, G., Mahad, D. J., Mercer, T. H. & van der Linden, M. L. Test-retest  
710 reliability and minimal detectable change of ankle kinematics and spatiotemporal parameters  
711 in MS population. *Gait & Posture* **74**, 218–222 (2019).
- 712 30. Levin, I., Lewek, M. D., Giuliani, C., Faldowski, R. & Thorpe, D. E. Test-retest reliability  
713 and minimal detectable change for measures of balance and gait in adults with cerebral  
714 palsy. *Gait & Posture* **72**, 96–101 (2019).

- 715 31. Lang, J. T., Kassan, T. O., Devaney, L. L., Colon-Semenza, C. & Joseph, M. F. Test-  
716 Retest Reliability and Minimal Detectable Change for the 10-Meter Walk Test in Older Adults  
717 With Parkinson's disease. *Journal of Geriatric Physical Therapy* **39**, (2016).
- 718 32. Strouwen, C. *et al.* Test-Retest Reliability of Dual-Task Outcome Measures in People  
719 With Parkinson Disease. *Physical Therapy* **96**, 1276–1286 (2016).
- 720 33. McGinley, J. L., Baker, R., Wolfe, R. & Morris, M. E. The reliability of three-dimensional  
721 kinematic gait measurements: A systematic review. *Gait & Posture* **29**, 360–369 (2009).
- 722 34. Fernandes, R., Armada-da-Silva, P., Pool-Goudaazward, A., Moniz-Pereira, V. &  
723 Veloso, A. P. Three dimensional multi-segmental trunk kinematics and kinetics during gait:  
724 Test-retest reliability and minimal detectable change. *Gait & Posture* **46**, 18–25 (2016).
- 725 35. Wilken, J. M., Rodriguez, K. M., Brawner, M. & Darter, B. J. Reliability and minimal  
726 detectible change values for gait kinematics and kinetics in healthy adults. *Gait & Posture* **35**,  
727 301–307 (2012).
- 728 36. Meldrum, D., Shouldice, C., Conroy, R., Jones, K. & Forward, M. Test–retest reliability of  
729 three dimensional gait analysis: Including a novel approach to visualising agreement of gait  
730 cycle waveforms with Bland and Altman plots. *Gait & Posture* **39**, 265–271 (2014).
- 731 37. Seethapathi, N., Wang, S., Saluja, R., Blohm, G. & Kording, K. P. Movement science  
732 needs different pose tracking algorithms. (2019) doi:10.48550/ARXIV.1907.10226.
- 733 38. Kwolek, B. *et al.* Calibrated and synchronized multi-view video and motion capture  
734 dataset for evaluation of gait recognition. *Multimedia Tools and Applications* **78**, 32437–  
735 32465 (2019).
- 736 39. Zeni, J. A., Richards, J. G. & Higginson, J. S. Two simple methods for determining gait  
737 events during treadmill and overground walking using kinematic data. *Gait & Posture* **27**,  
738 710–714 (2008).
- 739 40. Chung, C., Park, M., Lee, S., Kong, S. & Lee, K. Kinematic aspects of trunk motion and  
740 gender effect in normal adults. *Journal of NeuroEngineering and Rehabilitation* **7**, 9 (2010).



- 741 41. Patterson, K. K. *et al.* Gait Asymmetry in Community-Ambulating Stroke Survivors. *Arch*  
742 *Phys Med Rehab* **89**, 304–10 (2008).
- 743 42. Termoz, N. *et al.* The control of upright stance in young, elderly and persons with  
744 Parkinson's disease. *Gait & Posture* **27**, 463–470 (2008).
- 745

## 746 **Figure captions**

747 Fig. 1. Conceptual overview. We recorded three-dimensional (3D) motion capture and digital  
748 videos of gait trials performed by persons post-stroke and persons with Parkinson's disease (A).  
749 We analyzed digital videos of the frontal ( $C_{Front}$ ) and sagittal plane ( $C_{Sag}$ ) with OpenPose to track  
750 anatomical keypoints (B). We developed workflows to perform a gait analysis, independently, for  
751 videos of the frontal and sagittal plane (C). We compared spatiotemporal gait parameters and  
752 joint kinematics from our workflows to parameters obtained with 3D motion capture (D). Note  
753 that photographs in panel B have been replaced with silhouettes to conform to medRxiv policy.

754 Fig. 2. Diagram of frontal plane analysis to obtain spatiotemporal gait parameters. A person of  
755 size (height)  $s$  stands at two distances from a frontal plane camera ( $C_{Front}$ ; panel A): an initial  
756 reference depth ( $d_{Ref}$ ) and at a depth-change ( $\Delta d$ ). The size in pixels of the person at each  
757 depth are denoted by  $s_{Ref}$  and  $s_i$ . From trigonometric relationships we derive a relationship  
758 between pixel size and depth-change (B, see Methods for detailed explanation;  $f$ , focal length of  
759 camera;  $x_{IP}$ , position of image plane of camera;  $x_{Cam}$ , position of camera lens;  $x_{Ref}$ , initial position  
760 of person;  $x_i$ , position of person following depth-change). The predicted pixel sizes of a person  
761 standing at increasing depths closely tracks manually annotated pixel sizes, which shows that  
762 we can use pixel size to estimate depth-changes (C). Summary of our frontal plane workflow  
763 (D): OpenPose tracks anatomical keypoints, we find gait cycle events, calculate a time-series of  
764 pixel size, and calculate depth-change at which point step lengths and step times can be  
765 derived. Note that photographs in panels A, C and D have been replaced with silhouettes to  
766 conform to medRxiv policy.

767 Fig. 3. Testing of a novel approach for spatiotemporal gait analysis from videos of unimpaired  
768 adults recorded in the frontal plane. We recorded digital videos of the frontal plane where the  
769 person walked toward one camera and away from the other camera (A). We compared  
770 spatiotemporal gait parameters (B, step time; C, step length; D, gait speed) between the two

771 digital videos and 3D motion capture (see Table S1). Note that photographs in panel A have  
772 been replaced with silhouettes to conform to medRxiv policy.

773 Fig. 4. Video-based gait analysis from frontal and sagittal views in persons post-stroke. We  
774 recorded digital videos of the frontal and sagittal plane during gait trials (A). We compared  
775 spatiotemporal gait parameters (B, step time; C, step length; D, gait speed) and gait asymmetry  
776 (E, step time asymmetry; F, step length asymmetry) between the two digital videos and 3D  
777 motion capture. We also compared lower-limb joint kinematics at the hip, knee and ankle  
778 obtained with sagittal videos and motion capture for the paretic (G) and non-paretic (H) limbs  
779 (MAE, mean absolute error). Gait parameters are calculated as session-level averages of four  
780 gait trials at either preferred or fast speeds (see Table 1). Note that photographs in panel A  
781 have been replaced with silhouettes to conform to medRxiv policy.

782 Fig. 5. Video-based gait analysis from frontal and sagittal views in persons with Parkinson's  
783 disease. We recorded digital videos of the frontal and sagittal plane during gait trials (A). We  
784 compared spatiotemporal gait parameters (B, step time; C, step length; D, gait speed) between  
785 the two digital videos and 3D motion capture. We compared trunk inclination between sagittal  
786 plane videos and motion capture (E). We also compared lower-limb joint kinematics at the hip,  
787 knee and ankle obtained with sagittal videos and motion capture for the right (F) and non-paretic  
788 (G) limbs (MAE, mean absolute error). Gait parameters are calculated as session-level  
789 averages of four gait trials at either preferred or fast speeds (see Table 1). Note that  
790 photographs in panel A have been replaced with silhouettes to conform to medRxiv policy.

791 Fig. 6. Measuring changes in gait that occur due to changes in gait speed in persons post-  
792 stroke and persons with Parkinson's disease. We recorded digital videos of the frontal and  
793 sagittal plane during gait trials at preferred and fast speeds (A). We compared spatiotemporal  
794 gait parameters (B, step time; C, step length; D, gait speed) between the two digital videos and  
795 3D motion capture. Subscripts  $\Delta v$  of gait parameters denote changes in the gait parameter due

796 to speed-increases from preferred to fast speed walking trials. We calculated gait parameters as  
797 the difference between the session-level averages of preferred and fast speed trials (see  
798 Table 2). Note that photographs in panel A have been replaced with silhouettes to conform to  
799 medRxiv policy.

Table 1 Comparison of video-based and motion capture measurements of spatiotemporal gait parameters in the stroke and Parkinson's disease groups <sup>a</sup>

| Gait Parameter                               | Difference (Mean±SD) |                   |                                | Error (Mean±SD)   |                   |                                | 95% Limits of Agreement |                   |                                |
|----------------------------------------------|----------------------|-------------------|--------------------------------|-------------------|-------------------|--------------------------------|-------------------------|-------------------|--------------------------------|
|                                              | MC-C <sub>S</sub>    | MC-C <sub>F</sub> | C <sub>F</sub> -C <sub>S</sub> | MC-C <sub>S</sub> | MC-C <sub>F</sub> | C <sub>S</sub> -C <sub>F</sub> | MC-C <sub>S</sub>       | MC-C <sub>F</sub> | C <sub>F</sub> -C <sub>S</sub> |
| <i>Stroke</i>                                |                      |                   |                                |                   |                   |                                |                         |                   |                                |
| Step time (s)                                | 0.00±0.02            | 0.01±0.05         | 0.01±0.04                      | 0.02±0.01         | 0.05±0.04         | 0.05±0.04                      | -0.04; 0.04             | -0.09; 0.10       | -0.08; 0.09                    |
| Step length (m) <sup>b</sup>                 | 0.010±0.035          | -0.033±0.061      | -0.050±0.063                   | 0.028±0.024       | 0.072±0.037       | 0.079±0.044                    | -0.058; 0.079           | -0.154; 0.087     | -0.173; 0.073                  |
| Gait speed (m s <sup>-1</sup> ) <sup>b</sup> | 0.02±0.06            | -0.07±0.07        | -0.09±0.07                     | 0.04±0.05         | 0.10±0.06         | 0.12±0.06                      | -0.11; 0.14             | -0.20; 0.06       | -0.22; 0.04                    |
| Step time asym.                              | 0.01±0.03            | 0.02±0.06         | 0.01±0.06                      | 0.03±0.02         | 0.07±0.05         | 0.07±0.04                      | -0.04; 0.07             | -0.10; 0.14       | -0.10; 0.12                    |
| Step length asym. <sup>b</sup>               | -0.002±0.072         | -0.042±0.127      | -0.025±0.107                   | 0.050±0.053       | 0.106±0.097       | 0.100±0.073                    | -0.142; 0.138           | -0.291; 0.208     | -0.235; 0.186                  |
| <i>Parkinson's disease</i>                   |                      |                   |                                |                   |                   |                                |                         |                   |                                |
| Step time (s)                                | -0.00±0.01           | 0.01±0.02         | 0.01±0.02                      | 0.01±0.00         | 0.03±0.01         | 0.03±0.01                      | -0.02; 0.02             | -0.03; 0.05       | -0.03; 0.05                    |
| Step length (m) <sup>b</sup>                 | -0.010±0.017         | -0.051±0.050      | -0.041±0.055                   | 0.021±0.009       | 0.074±0.042       | 0.075±0.040                    | -0.044; 0.023           | -0.150; 0.048     | -0.149; 0.068                  |
| Gait speed (m s <sup>-1</sup> ) <sup>b</sup> | -0.02±0.02           | -0.12±0.08        | -0.10±0.09                     | 0.03±0.02         | 0.15±0.07         | 0.15±0.06                      | -0.07; 0.03             | -0.28; 0.04       | -0.27; 0.07                    |
| Trunk incl. (°) <sup>c</sup>                 | -0.0±1.5             | ...               | ...                            | 1.5±0.7           | ...               | ...                            | -3.0; 2.9               | ...               | ...                            |

MC, motion capture; C<sub>S</sub>, sagittal plane camera; C<sub>F</sub>, frontal plane camera

<sup>a</sup> Values of spatiotemporal gait parameters are calculated as session-level averages.

<sup>b</sup> Parameter depending on step length: comparisons of MC and C<sub>S</sub>, step length calculated as distance between ankles at heel-strike; comparisons of MC and C<sub>F</sub> and of C<sub>S</sub> and C<sub>F</sub>, step length calculated as distance travelled by torso between consecutive heel-strikes.

<sup>c</sup> Missing values because trunk inclination cannot be calculated from C<sub>F</sub>.

Table 2 Comparison of video-based and motion capture measurements of speed-related changes of spatiotemporal gait parameters of stroke and PD groups <sup>a</sup>

| Gait Parameter                               | Difference (Mean±SD) |                   |                                | Error (Mean±SD)   |                   |                                | 95% Limits of Agreement |                   |                                |
|----------------------------------------------|----------------------|-------------------|--------------------------------|-------------------|-------------------|--------------------------------|-------------------------|-------------------|--------------------------------|
|                                              | MC-C <sub>S</sub>    | MC-C <sub>F</sub> | C <sub>F</sub> -C <sub>S</sub> | MC-C <sub>S</sub> | MC-C <sub>F</sub> | C <sub>S</sub> -C <sub>F</sub> | MC-C <sub>S</sub>       | MC-C <sub>F</sub> | C <sub>F</sub> -C <sub>S</sub> |
| <i>Stroke</i>                                |                      |                   |                                |                   |                   |                                |                         |                   |                                |
| Step time (s)                                | -0.00±0.01           | -0.00±0.04        | -0.00±0.04                     | 0.02±0.01         | 0.04±0.03         | 0.05±0.03                      | -0.03; 0.03             | -0.08; 0.07       | -0.07; 0.07                    |
| Step length (m) <sup>b</sup>                 | 0.003±0.017          | -0.007±0.042      | -0.001±0.044                   | 0.021±0.012       | 0.054±0.027       | 0.058±0.029                    | -0.031; 0.037           | -0.088; 0.075     | -0.087; 0.085                  |
| Gait speed (m s <sup>-1</sup> ) <sup>b</sup> | 0.01±0.05            | -0.02±0.06        | -0.02±0.05                     | 0.04±0.04         | 0.06±0.05         | 0.06±0.04                      | -0.09; 0.11             | -0.14; 0.11       | -0.12; 0.08                    |
| <i>Parkinson's disease</i>                   |                      |                   |                                |                   |                   |                                |                         |                   |                                |
| Step time (s)                                | -0.00±0.01           | -0.00±0.02        | -0.00±0.02                     | 0.02±0.01         | 0.03±0.02         | 0.04±0.02                      | -0.02; 0.02             | -0.05; 0.04       | -0.05; 0.04                    |
| Step length (m) <sup>b</sup>                 | 0.003±0.013          | -0.026±0.049      | -0.015±0.056                   | 0.019±0.007       | 0.067±0.035       | 0.073±0.039                    | -0.022; 0.028           | -0.122; 0.070     | -0.125; 0.094                  |
| Gait speed (m s <sup>-1</sup> ) <sup>b</sup> | 0.00±0.02            | -0.07±0.06        | -0.04±0.06                     | 0.03±0.01         | 0.11±0.06         | 0.10±0.05                      | -0.04; 0.04             | -0.19; 0.06       | -0.16; 0.08                    |

MC, motion capture; C<sub>S</sub>, sagittal plane camera; C<sub>F</sub>, frontal plane camera

<sup>a</sup> Speed-changes are differences between preferred and fast speed walking trials; gait parameters are calculated as session-level averages.

<sup>b</sup> Parameter depending on step length: comparisons of MC and C<sub>S</sub>, step length calculated as distance between ankles at heel-strike; comparisons of MC and C<sub>F</sub> and of C<sub>S</sub> and C<sub>F</sub>, step length calculated as distance travelled by torso between consecutive heel-strikes.

**Fig. 1**

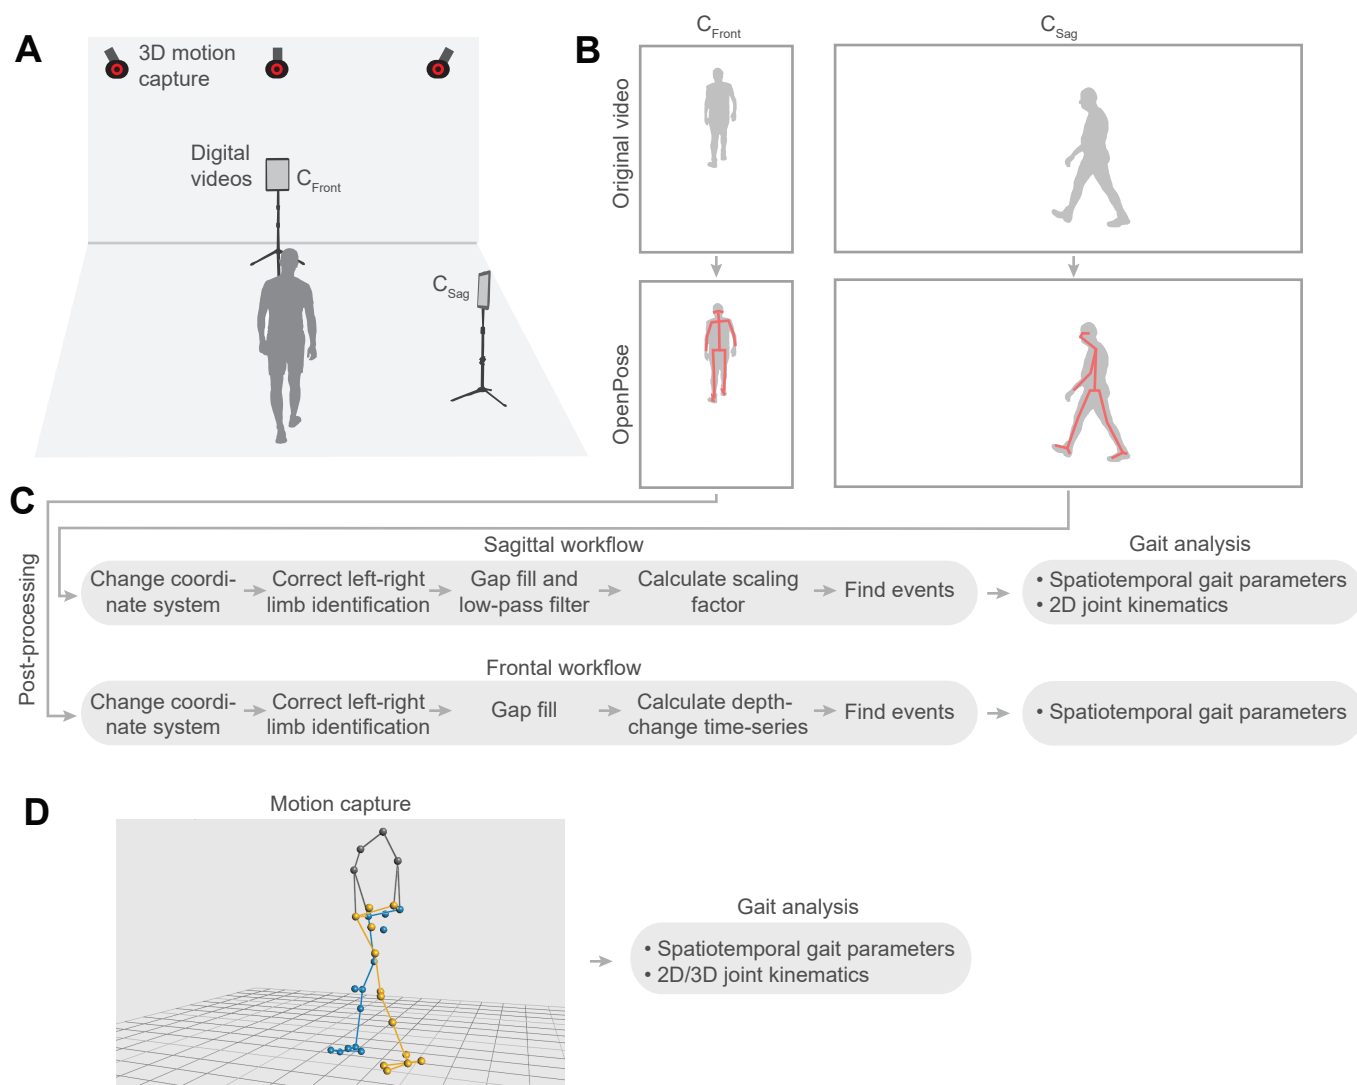

**Fig. 2**

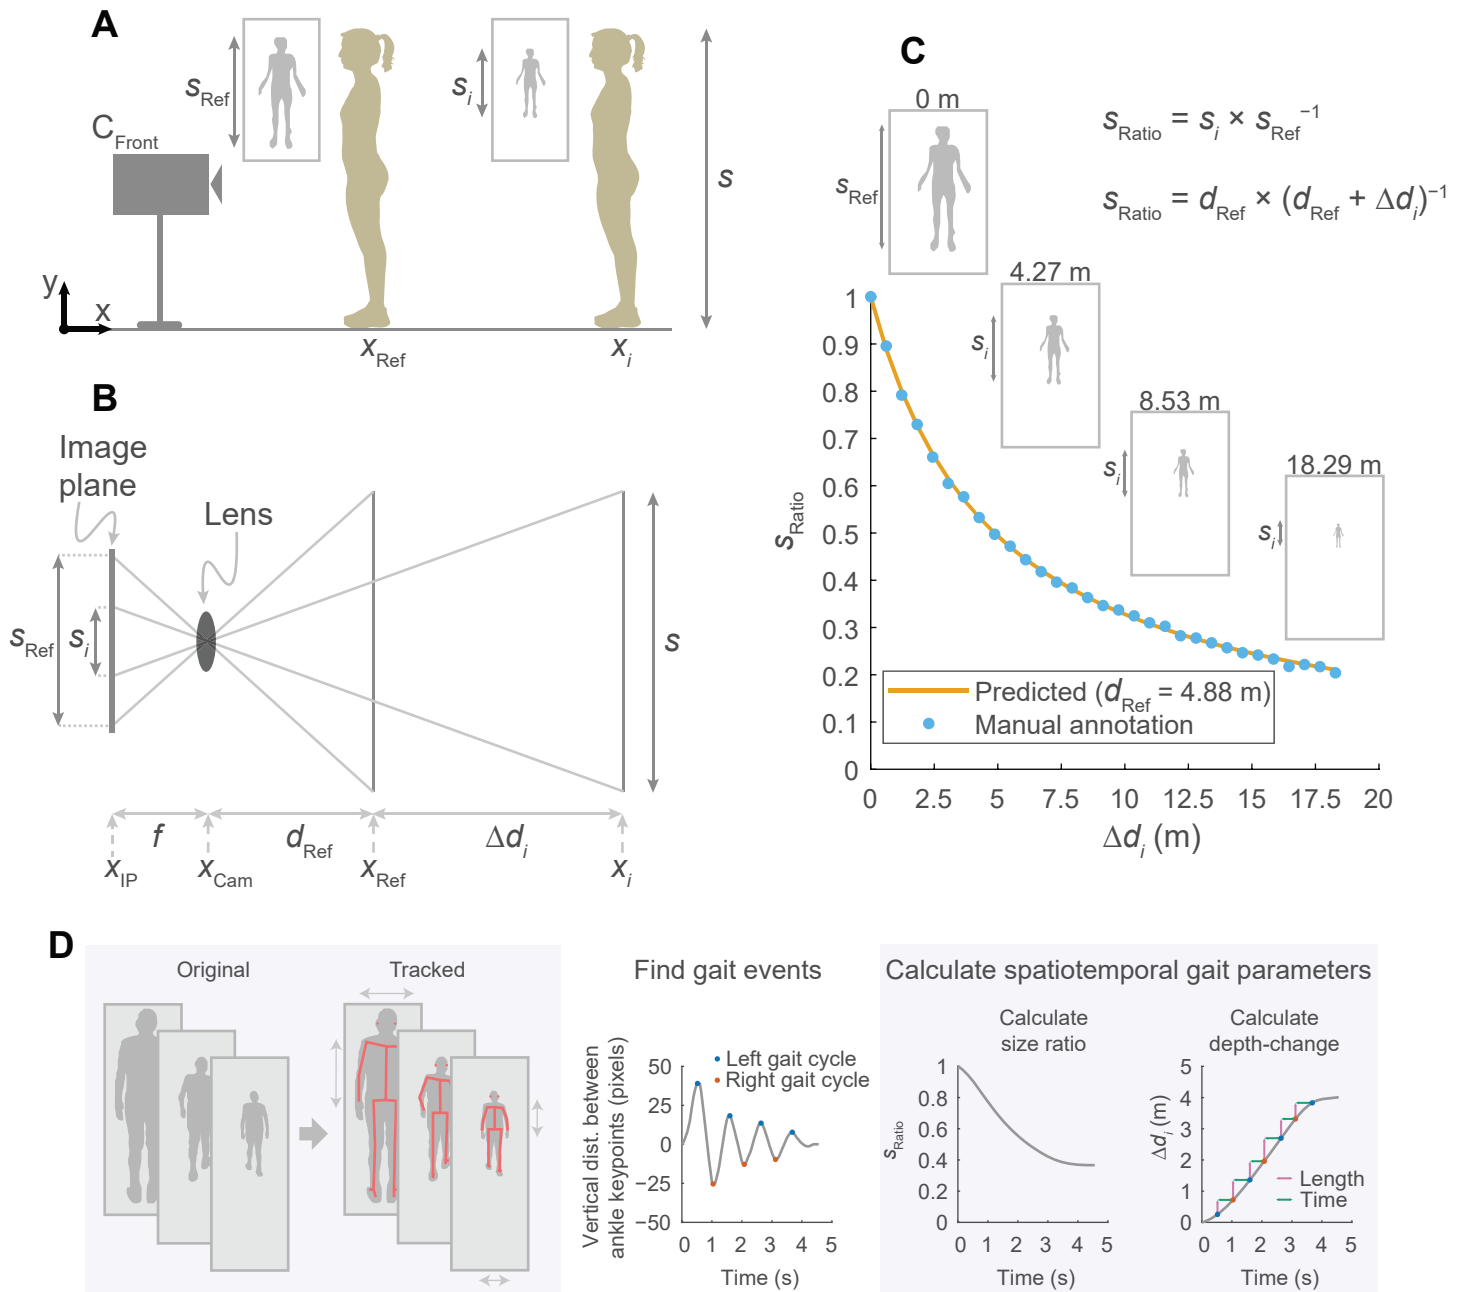



**Fig. 3**

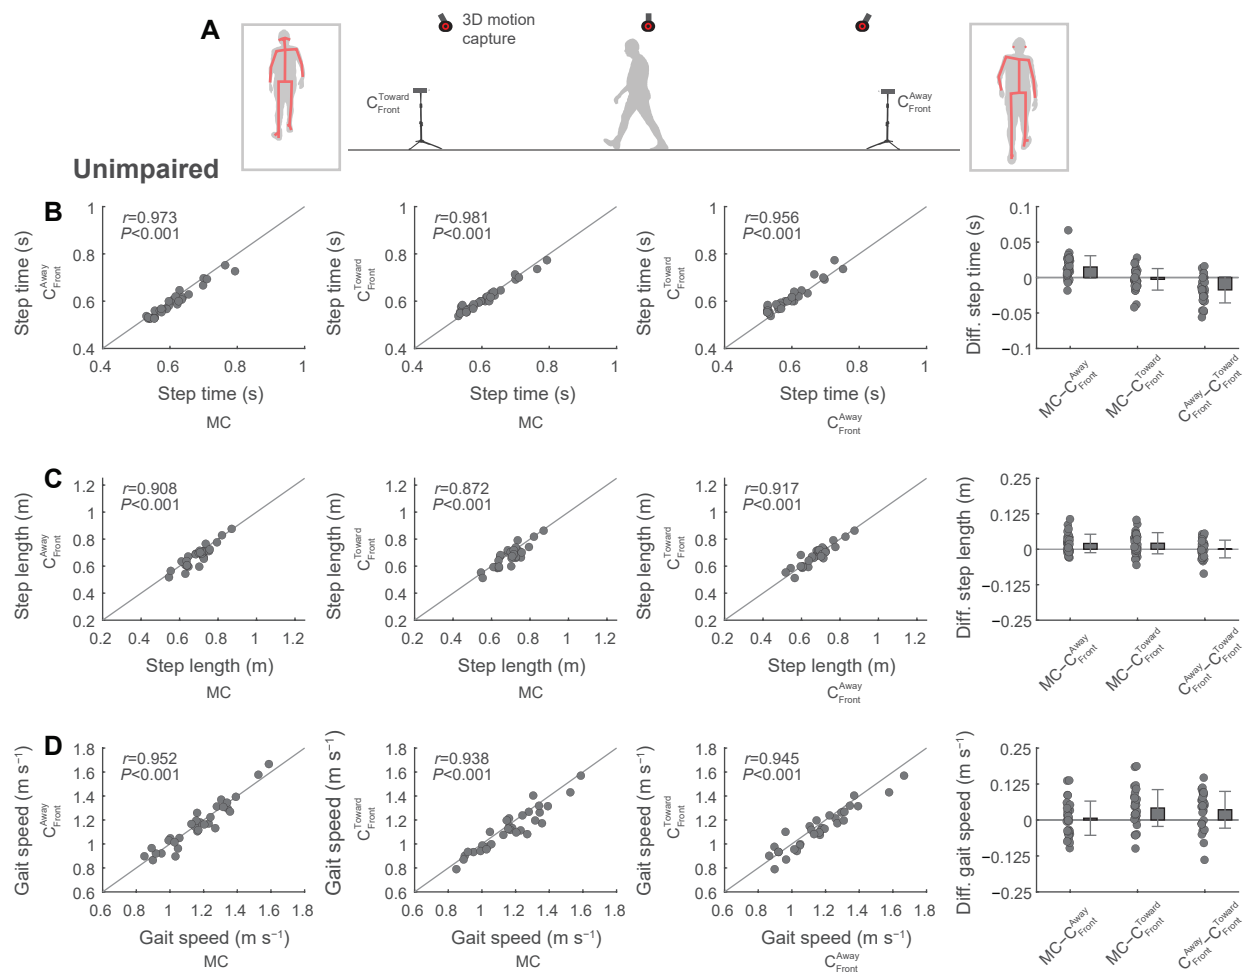

**Fig. 4**

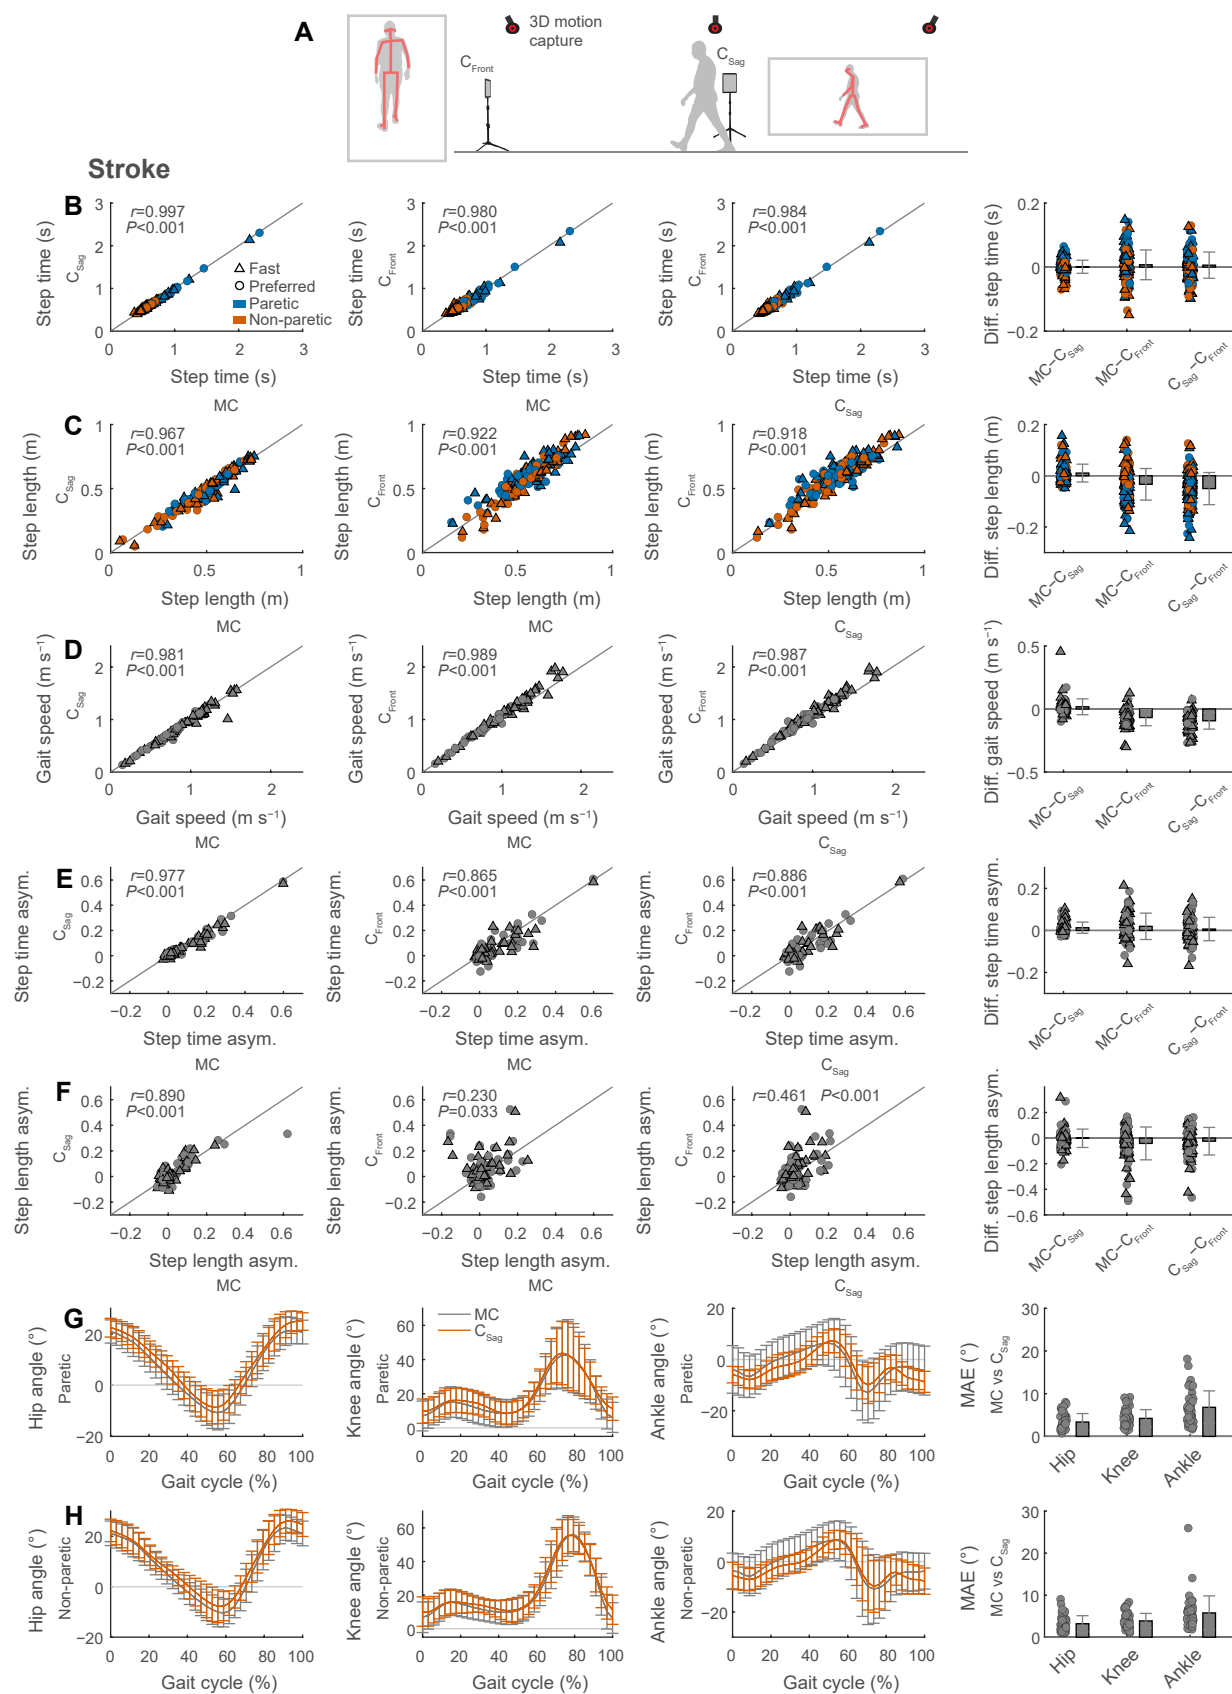

**Fig. 5**

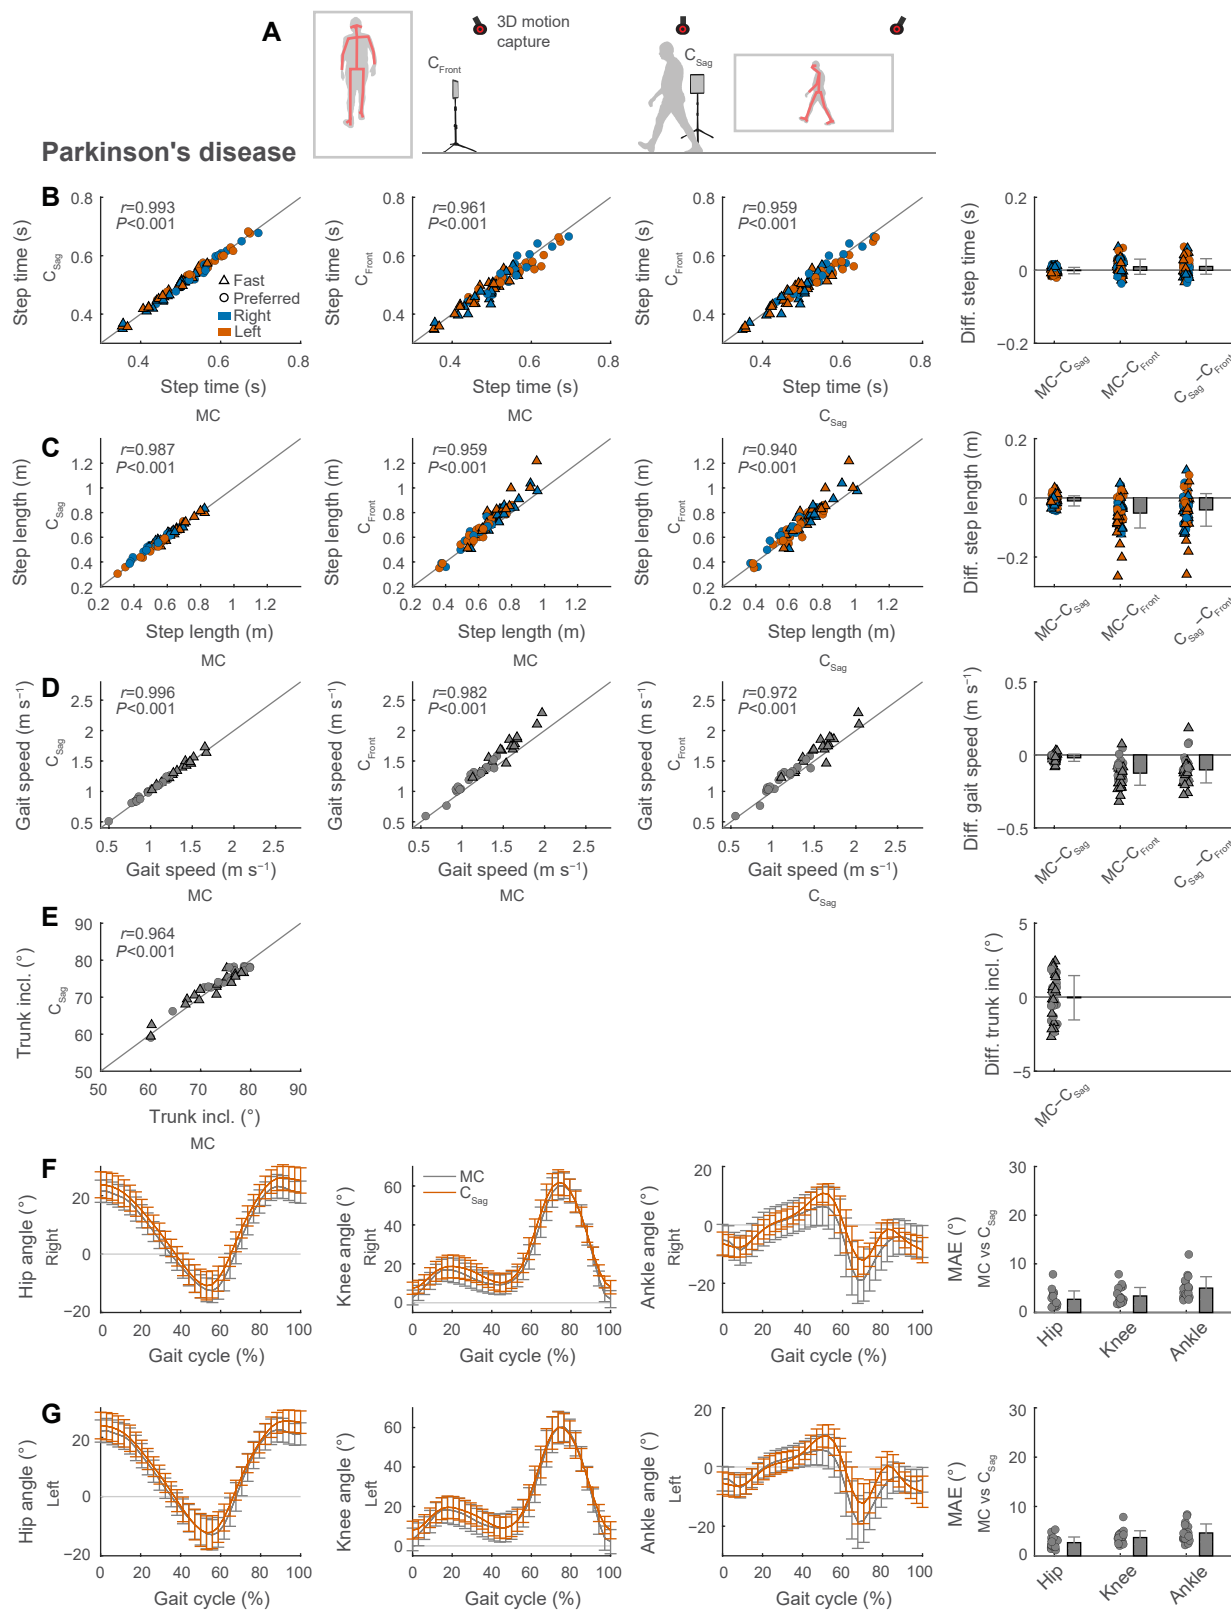

**Fig. 6**

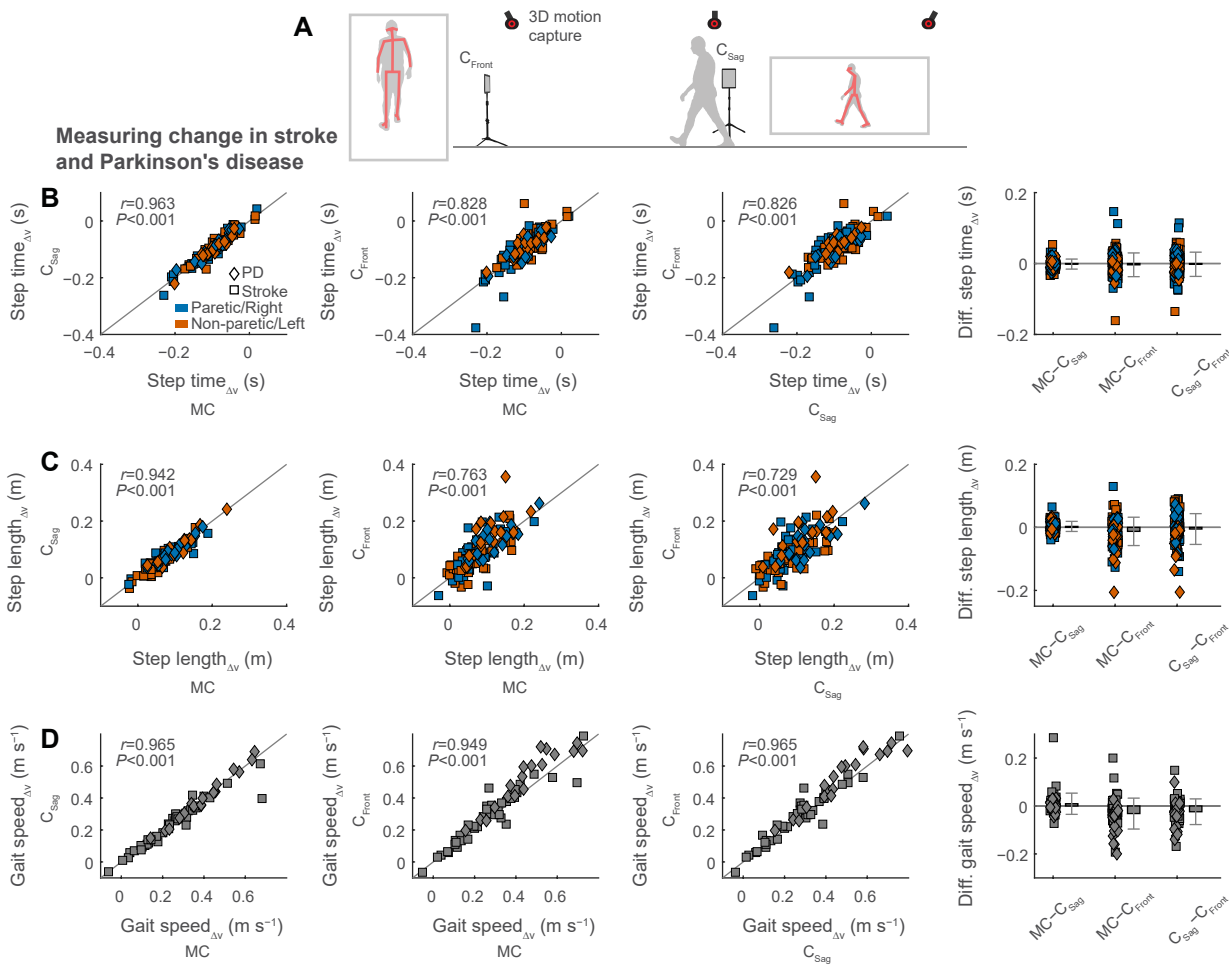

Source: https://medrxiv.org/content/10.1101/2023.01.26.23285007.full.pdf
